# Supplementary material for: Racial Disparities in Triple Negative Breast Cancer: Toward a Causal Architecture Approach
Source: Research Square preprint supplement (doi:10.21203/rs.3.rs-1177963/v1), 2021-12-21
Supplement: Supplementary file 1 [file 549f46c2e2af2de6e3285113.docx]

**Supplemental Methods/Results**

Significant census tract-level variance was present in the null model (i.e., when no patient- or tract-level covariates were included). However, in most analyses adjusting for patient-level variables, the estimated variance of the tract-level random effect was either insignificant or very small and marginally significant. See Supplemental Table 1 for variance estimates.

See Supplemental Table 2 for models that included cross-level interaction terms between patient-level race and tract-level ICE.

See Supplemental Table 3 for census tract characteristics by TNBC prevalence and ICE-Income quintiles and Supplemental Table 4 for census tract characteristics by TNBC prevalence and ICE-Race/Income quintiles.

Supplemental Table 1. Variance of census tract random effect for breast cancer subtype (triple negative breast cancer vs. not), before and after covariate adjustment

|  | Breast cancer patients  (*N*=3316) |
| --- | --- |
| Univariate models:  census tract random effect,  variance (p-value) |
| No covariates | 0.092 (0.014)* |
| Age at diagnosis | 0.079 (0.017)* |
| Race | 0.002 (0.417) |
| Insurancea | 0.055 (0.173) |
| Census tract ICE-Race quintiles | x |
| Census tract ICE-Income quintiles | 0.054 (0.041)* |
| Census tract ICE-Race/Income quintiles | 0.032 (0.112) |

aCensus tract random effect variance adjusted for insurance (commercial, Medicaid/none) is from model that excludes patients age 65 and up and those with Medicare insurance in order to better model insurance as a proxy measure for socioeconomic status (*N*=1691).

x. Census tract random effect variance not reported due to singular model fit.

*Significant at p<0.05, **significant at p<0.001

Supplemental Table 2. Odds of triple negative breast cancer by race and census tract ICE interactions

|  | Breast cancer patients  (*N*=3316) | | | |
| --- | --- | --- | --- | --- |
| Univariate  OR, 95% CI | Multivariate  (race ICE)  AOR, 95% CI | Multivariate  (income ICE)  AOR, 95% CI | Multivariate (race/income ICE)  AOR, 95% CI |
| Age at diagnosisa | 0.93 (0.89, 0.96)** | 0.94 (0.91, 0.98)* | 0.94 (0.90, 0.97)** | 0.94 (0.91, 0.98)* |
| Race (ref=White) | | | | |
| Black/African American | 2.48 (2.01, 3.05)** | 1.31 (0.31, 3.91) | 2.05 (1.16, 3.50)* | 1.46 (0.62, 3.06) |
| Insurance (ref=commercial) | | | | |
| Medicaid/noneb | 1.29 (0.83, 1.95) | -- | -- | -- |
| Census tract ICE-Race (ref=Q5) | | | | |
| Q1 (most disadvantaged) | 3.45 (2.41, 4.99)** | 2.51 (1.48, 4.19)** | -- | -- |
| Q2 | 2.12 (1.49, 3.06)** | 1.60 (1.06, 2.42)* | -- | -- |
| Q3 | 1.81 (1.27, 2.60)* | 1.38 (0.93, 2.05) | -- | -- |
| Q4 | 1.86 (1.30, 2.69)** | 1.69 (1.16, 2.50)* | -- | -- |
| Race * ICE-Race (refs=Black, Q5) | | | | |
| Black * Q1 | -- | 1.16 (0.35, 5.34) | -- | -- |
| Black * Q2 | -- | 1.55 (0.47, 7.01) | -- | -- |
| Black * Q3 | -- | 2.02 (0.62, 9.20) | -- | -- |
| Black * Q4 | -- | 1.61 (0.45, 7.69) | -- | -- |
| Census tract ICE-income (ref=Q5) | | | | |
| Q1 (most disadvantaged) | 1.90 (1.38, 2.61)** | -- | 1.26 (0.76, 2.02) | -- |
| Q2 | 1.68 (1.24, 2.27)** | -- | 1.54 (1.06, 2.22)* | -- |
| Q3 | 1.15 (0.82, 1.60) | -- | 0.95 (0.63, 1.40) | -- |
| Q4 | 1.39 (1.04, 1.85)* | -- | 1.28 (0.92, 1.78) | -- |
| Race * ICE-Income  (refs=Black, Q5) | | | | |
| Black * Q1 | -- | -- | 1.15 (0.55, 2.50) | -- |
| Black * Q2 | -- | -- | 0.80 (0.40, 1.65) | -- |
| Black * Q3 | -- | -- | 1.79 (0.81, 4.00) | -- |
| Black * Q4 | -- | -- | 1.09 (0.54, 2.22) | -- |
| Census tract ICE-Race/Income  (ref=Q5) | | | | |
| Q1 (most disadvantaged) | 2.07 (1.49, 2.88)** | -- | -- | 1.26 (0.70, 2.15) |
| Q2 | 1.70 (1.26, 2.30)** | -- | -- | 1.30 (0.90, 1.86) |
| Q3 | 1.14 (0.82, 1.58) | -- | -- | 1.02 (0.71, 1.46) |
| Q4 | 1.13 (0.83, 1.54) | -- | -- | 0.89 (0.63, 1.27) |
| Race * ICE-Race/Income  (refs=Black, Q5) | | | | |
| Black * Q1 | -- | -- | -- | 1.39 (0.54, 3.90) |
| Black * Q2 | -- | -- | -- | 1.40 (0.60, 3.600 |
| Black * Q3 | -- | -- | -- | 1.55 (0.60, 4.31) |
| Black * Q4 | -- | -- | -- | 1.98 (0.82, 5.24) |

aOR and AORs correspond to 5-year increases in age.

bOR for insurance is from model that excludes patients age 65 and up and those with Medicare insurance in order to better model insurance as a proxy measure for socioeconomic status (*N*=1691).

*Significant at p<0.05, **significant at p<0.001

Supplemental Table 3. Census tract characteristics by TNBC prevalence and income-ICE quintiles

|  | Lower TNBC,  lower ICE-Income disadvantage  (population *N*=43412, tract *N*=10)a | Lower TNBC,  higher ICE-Income disadvantage  (population *N*=6231, tract *N*=2)b | Higher TNBC,  lower ICE-Income disadvantage  (population *N*=14524, tract *N*=2)c | Higher TNBC,  higher ICE-Income disadvantage  (population *N*=27624, tract *N*=9)d |
| --- | --- | --- | --- | --- |
| % TNBCe | 4.3% | 2.4% | 20.0% | 26.4% |
| Income-ICE, mean (SD)f | 0.36 (0.06) | -0.15 (0.05) | 0.40 (0.01) | -0.29 (0.17) |
| % Blackf | 8.6% | 24.2% | 14.7% | 56.2% |
| % povertyf | 3.6% | 18.9% | 3.4% | 32.3% |
| % without high school educationf,g | 4.4% | 15.7% | 4.8% | 14.2% |
| Alcohol retailers | 5 | 5 | 2 | 16 |
| Fast-food retailers | 6 | 4 | 1 | 9 |
| Alcohol retailers per 1000 people | 0.12 | 0.80 | 0.14 | 0.58 |
| Fast-food retailers per 1000 people | 0.14 | 0.64 | 0.07 | 0.33 |
| % with AUDh | 13.1% | 21.4% | 10.2% | 28.4% |
| % with obesityh | 31.9% | 43.5% | 39.3% | 45.3% |

aCorresponds to light grey tracts in figure 1B

bCorresponds to teal tracts in figure 1B

cCorresponds to magenta tracts in figure 1B

dCorresponds to dark purple tracts in figure 1B

eTNBC prevalence determined from patients diagnosed with invasive breast cancer at HFGCCRI between 2012-2020 (*N*=3449)

fCensus tract population data from American Community Survey 5-year estimates, 2014-2018

gEducational attainment defined for the population aged 25 and older

hAUD and obesity prevalence determined from adults hospitalized at Christiana Care between July 1, 2018 and June 30, 2019 (*N*=20310)

Supplemental Table 4. Census tract characteristics by TNBC prevalence and ICE-Race/Income quintiles

|  | Lower TNBC,  lower ICE-Race/Income disadvantage  (population *N*=35754, tract *N*=9)a | Lower TNBC,  higher ICE-Race/Income disadvantage  (population *N*=4989, tract *N*=2)b | Higher TNBC,  lower ICE-Race/Income disadvantage  (population *N*=14524, tract *N*=2)c | Higher TNBC,  higher ICE-Race/Income disadvantage  (population *N*=26950, tract *N*=9)d |
| --- | --- | --- | --- | --- |
| % TNBCe | 3.9% | 0.0% | 20.0% | 29.0% |
| Race/income-ICE, mean (SD)f | 0.37 (0.07) | -0.12 (0.12) | 0.34 (0.02) | -0.21 (0.17) |
| % Blackf | 5.6% | 56.0% | 14.7% | 64.5% |
| % povertyf | 3.4% | 27.0% | 3.4% | 33.5% |
| % without high school educationf,g | 4.0% | 15.4% | 4.8% | 14.2% |
| Alcohol retailers | 5 | 4 | 2 | 17 |
| Fast-food retailers | 5 | 5 | 1 | 10 |
| Alcohol retailers per 1000 people | 0.14 | 0.80 | 0.14 | 0.63 |
| Fast-food retailers per 1000 people | 0.14 | 1.00 | 0.07 | 0.37 |
| % with AUDh | 13.7% | 23.9% | 10.2% | 29.1% |
| % with obesityh | 31.0% | 38.7% | 39.3% | 44.5% |

aCorresponds to light grey tracts in figure 1C

bCorresponds to teal tracts in figure 1C

cCorresponds to magenta tracts in figure 1C

dCorresponds to dark purple tracts in figure 1C

eTNBC prevalence determined from patients diagnosed with invasive breast cancer at HFGCCRI between 2012-2020 (*N*=3449)

fCensus tract population data from American Community Survey 5-year estimates, 2014-2018

gEducational attainment defined for the population aged 25 and older

hAUD and obesity prevalence determined from adults hospitalized at Christiana Care between July 1, 2018 and June 30, 2019 (*N*=20310)
